# Supplementary material for: PDPN+ CAFs facilitate the motility of OSCC cells by inhibiting ferroptosis via transferring exosomal lncRNA FTX
Source: PubMed Central journal article supplement (PMC10665425; doi:10.1038/s41419-023-06280-3), 2023-11-22

**PDPN<sup>+</sup> CAFs facilitate the motility of OSCC cells by inhibiting ferroptosis via transferring exosomal lncRNA FTX**

**Original Western Blot**

**Fig.2B**

left panel

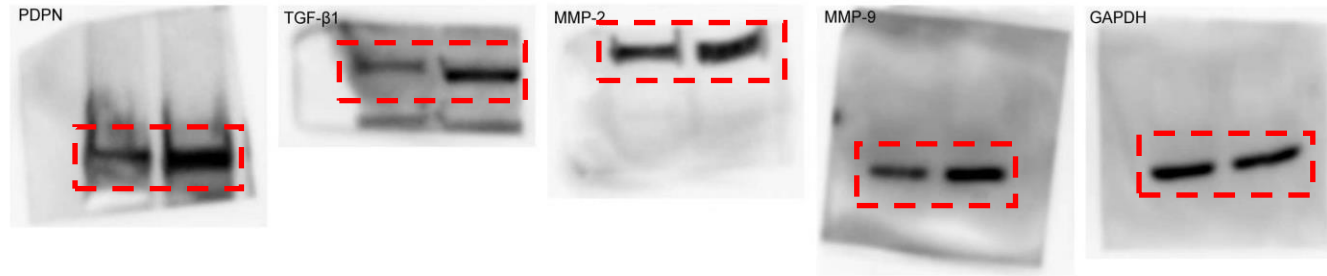

right panel

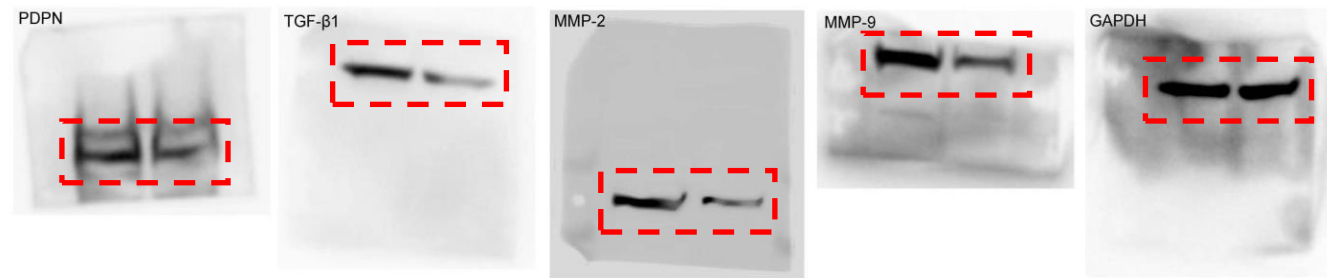

**Fig.3C**

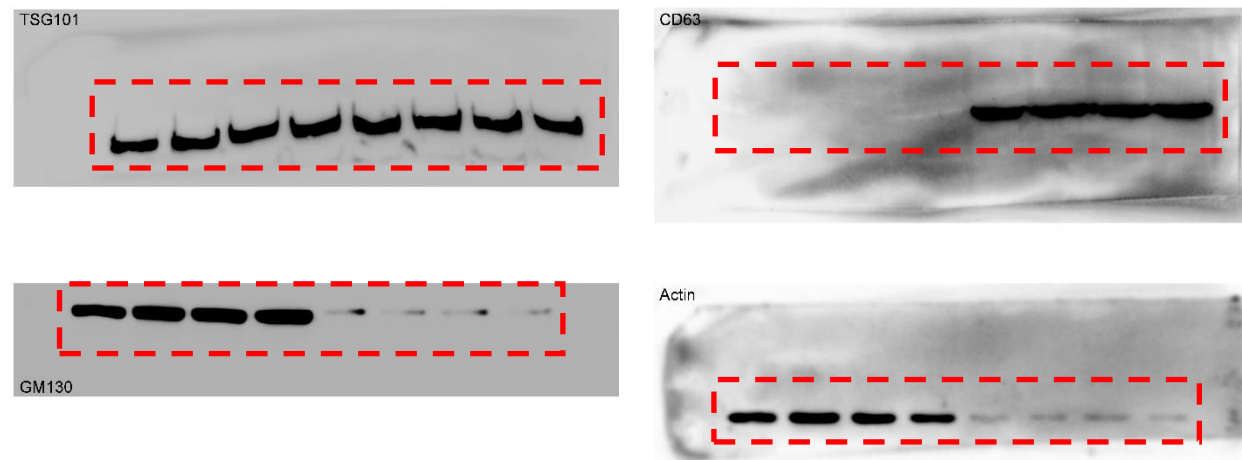

**Fig.4**

**H**

Silver staining of biotinylated FTX-associated proteins

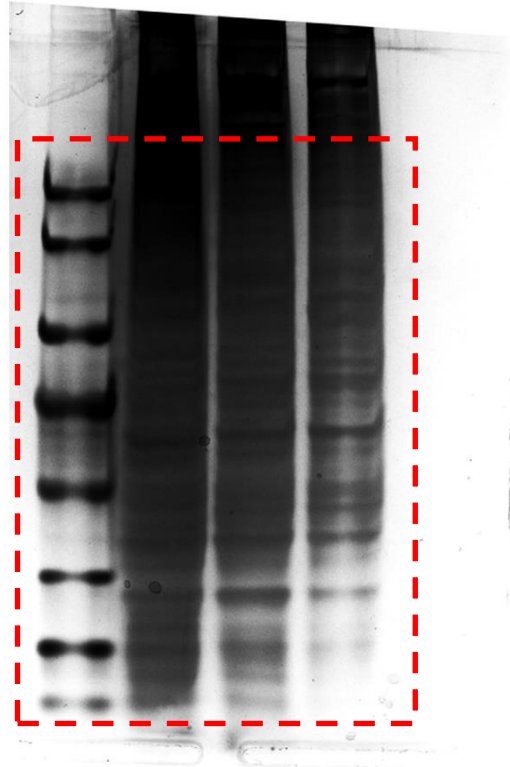

**I**

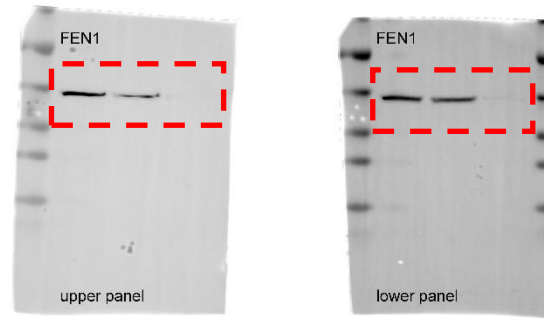

**L**

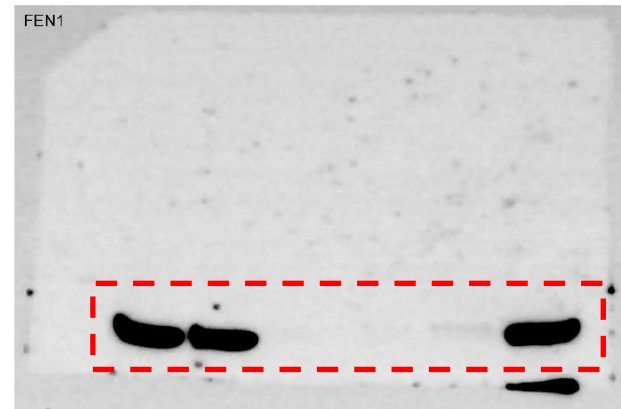

**Fig.5**

**B**

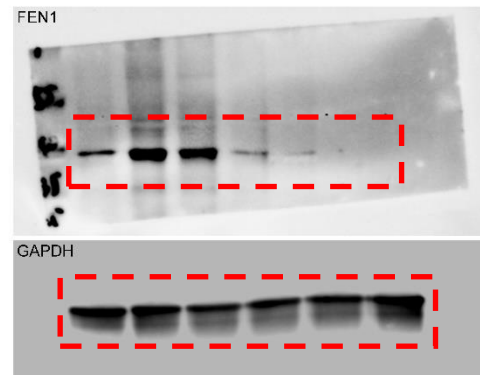

**D**

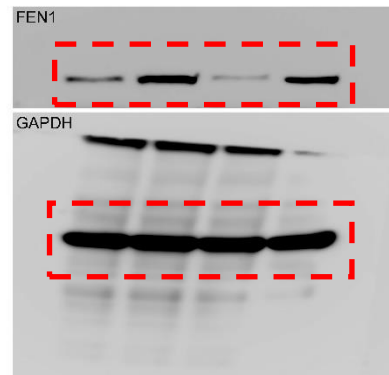

**I**

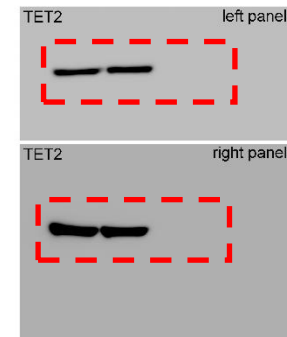

**Fig.7**

A

left panel

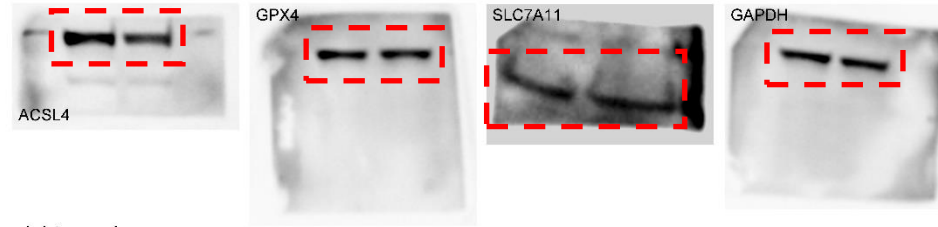

right panel

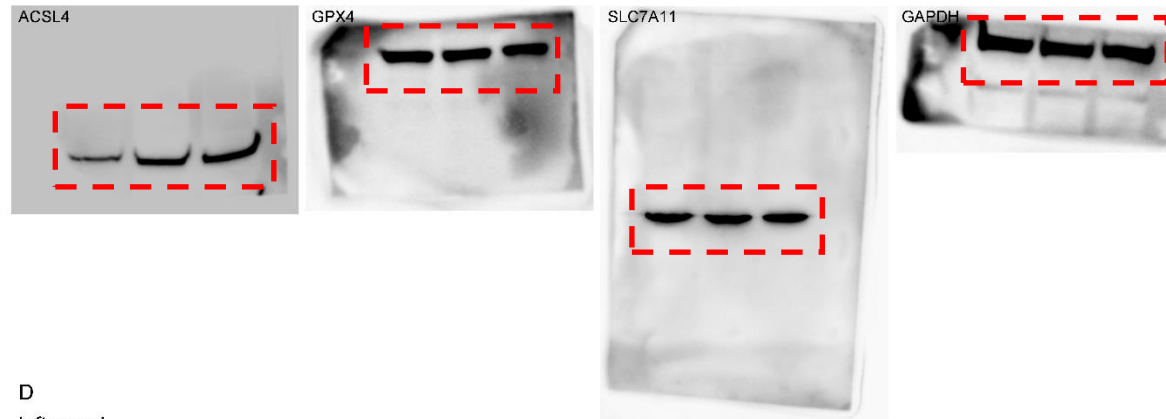

D

left panel

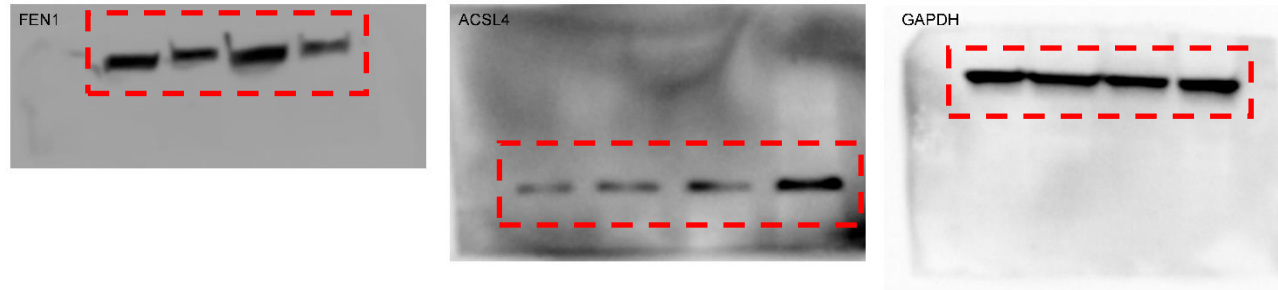

right panel

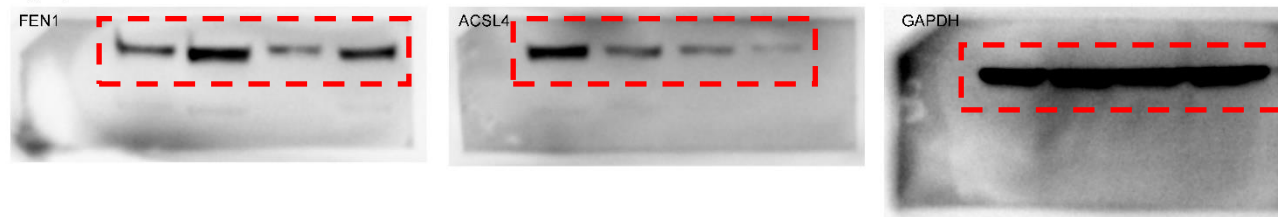

**Fig.S2**

B

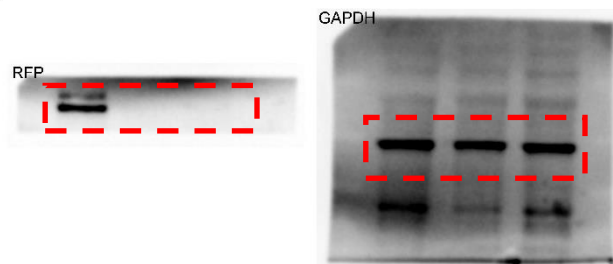

**Fig.S5**

A

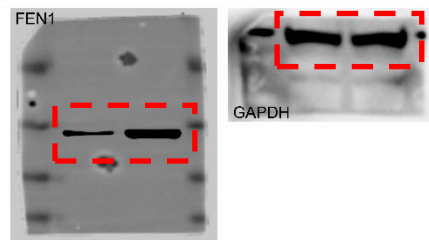

B

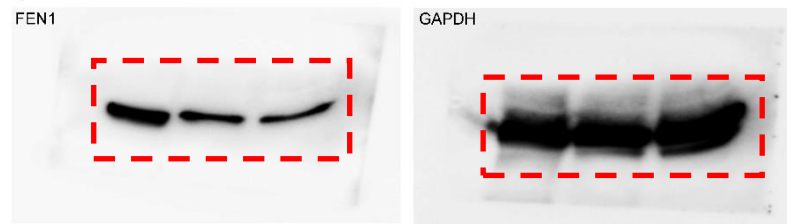

Supplement: 41419_2023_6280_MOESM9_ESM.pdf [file 41419_2023_6280_MOESM9_ESM.pdf]
